# Supplementary material for: Role of RPA Phosphorylation in the ATR-Dependent G2 Cell Cycle Checkpoint
Source: MDPI journal article supplement (doi:10.3390/genes14122205), 2023-12-13
Supplement: s1 [file s1]

# Role of RPA phosphorylation in the ATR-dependent G2 cell cycle checkpoint

Shengqin Liu, Brendan M. Byrne, Thomas N. Byrne and Greg G. Oakley

Supplemental Figure 1

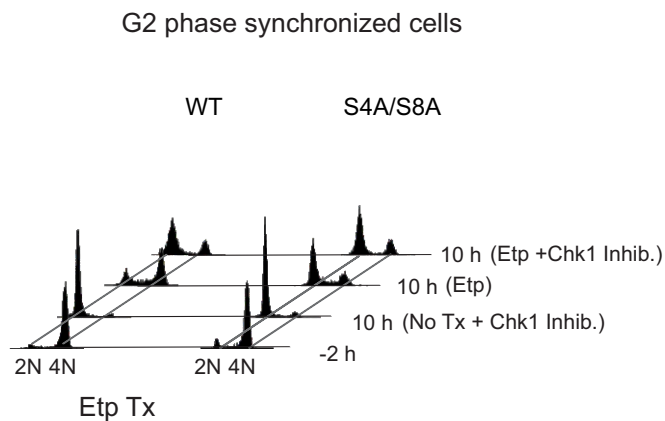

Supplemental Figure 1. FACS analysis of cells following synchronization in G2. Comparison of WT and S4A/S8A RPA32 expressing cells treated as indicated for 2 h with etoposide (20  $\mu$ M) and/or Chk1 inhibitor SB218078 and analyzed at 10 h after etoposide removal.
